# Supplementary material for: Temperature regulation in the Balkan spadefoot (Pelobates balcanicus Karaman, 1928) at the beginning of nocturnal activity
Source: PeerJ. 2022 Jul 15;10:e13647. doi: 10.7717/peerj.13647 (PMC9291013; doi:10.7717/peerj.13647)
Supplement: Supplemental Information 1 [file peerj-10-13647-s001.xlsx]

## Sheet: 14.6.2020
																							14.6.2020 г. 21:43:00	14.6.2020 г. 22:03:24	14.6.2020 г. 22:18:11	14.6.2020 г. 22:30:42	14.6.2020 г. 22:41:04
14.6.2020 г. 21:43:00				14.6.2020 г. 22:03:24				14.6.2020 г. 22:18:11				14.6.2020 г. 22:30:42				14.6.2020 г. 22:41:04							Measurements	Measurements	Measurements	Measurements	Measurements
	Max	Min	Average		Max	Min	Average		Max	Min	Average		Max	Min	Average		Max	Min	Average	Average±St.Deviation			Bx1 Max 17.6 °C	Bx1 Max 18.4 °C	Bx1 Max 20.4 °C	Bx1 Max 17.9 °C	Bx1 Max 15.2 °C
El1	14.6	14.3	14.4	El1	14.4	14.3	14.3	El1	14.6	14.4	14.5	El1	14.9	14.2	14.4	El1	13.2	12.9	13	14.12	0.56356	Head	Min 14.2 °C	Min 14.2 °C	Min 14.4 °C	Min 14.2 °C	Min 12.9 °C
El2	14.5	14.3	14.4	El2	14.4	14.3	14.4	El2	14.6	14.6	14.6	El2	14.6	14.4	14.5	El2	13.3	13.2	13.2	14.22	0.515364	Back	Average 16.2 °C	Average 15.8 °C	Average 16.2 °C	Average 15.8 °C	Average 14.3 °C
El3	14.7	14.3	14.4	El3	14.4	14.2	14.3	El3	14.8	14.5	14.7	El3	15.2	14.6	14.8	El3	13.4	13.1	13.2	14.28	0.570614	Annus	El1 Max 14.6 °C	El1 Max 14.4 °C	El1 Max 14.6 °C	El1 Max 14.9 °C	El1 Max 13.2 °C
El4	15.2	14.3	14.5	El4	14.6	14.3	14.3	El4	15.1	14.5	14.7	El4	15.6	14.4	14.7	El4	13.8	13	13.3	14.3	0.521536	Front right	Min 14.3 °C	Min 14.3 °C	Min 14.4 °C	Min 14.2 °C	Min 12.9 °C
El5	15	14.3	14.5	El5	14.9	14.3	14.4	El5	15.1	14.5	14.6	El5	15.3	14.3	14.5	El5	13.6	13.1	13.3	14.26	0.484149	Front left	Average 14.4 °C	Average 14.3 °C	Average 14.5 °C	Average 14.4 °C	Average 13.0 °C
El6	15	14.4	14.6	El6	14.3	14.3	14.3	El6	14.9	14.6	14.8	El6	15.8	14.5	15	El6	13.8	13.2	13.4	14.42	0.56	Middle right	El2 Max 14.5 °C	El2 Max 14.4 °C	El2 Max 14.6 °C	El2 Max 14.6 °C	El2 Max 13.3 °C
El7	14.8	14.4	14.6	El7	15	14.3	14.5	El7	14.9	14.5	14.6	El7	15.3	14.6	14.9	El7	13.3	13.2	13.3	14.38	0.556417	Middle left	Min 14.3 °C	Min 14.3 °C	Min 14.6 °C	Min 14.4 °C	Min 13.2 °C
El8	15	14.5	14.6	El8	15.1	14.3	14.5	El8	15.2	14.4	14.7	El8	15.5	14.5	14.9	El8	13.4	13.2	13.3	14.4	0.565685	Back left	Average 14.4 °C	Average 14.4 °C	Average 14.6 °C	Average 14.5 °C	Average 13.2 °C
El9	14.9	14.4	14.5	El9	14.5	14.2	14.3	El9	14.9	14.6	14.7	El9	14.9	14.3	14.6	El9	13.4	13.3	13.3	14.28	0.507543	Back right	El3 Max 14.7 °C	El3 Max 14.4 °C	El3 Max 14.8 °C	El3 Max 15.2 °C	El3 Max 13.4 °C
																				Global average			Min 14.3 °C	Min 14.2 °C	Min 14.5 °C	Min 14.6 °C	Min 13.1 °C
Average	14.8556	14.3556	14.5	Average	14.6222	14.2778	14.3667	Average	14.9	14.5111	14.6556	Average	15.2333	14.4222	14.7	Average	13.4667	13.1333	13.2556	14.2956	0.533222		Average 14.4 °C	Average 14.3 °C	Average 14.7 °C	Average 14.8 °C	Average 13.2 °C
Max	15.2	14.5	14.6	Max	15.1	14.3	14.5	Max	15.2	14.6	14.8	Max	15.8	14.6	15	Max	13.8	13.3	13.4	15			El4 Max 15.2 °C	El4 Max 14.6 °C	El4 Max 15.1 °C	El4 Max 15.6 °C	El4 Max 13.8 °C
Min	14.5	14.3	14.4	Min	14.3	14.2	14.3	Min	14.6	14.4	14.5	Min	14.6	14.2	14.4	Min	13.2	12.9	13	13			Min 14.3 °C	Min 14.3 °C	Min 14.5 °C	Min 14.4 °C	Min 13.0 °C
Range	0.7	0.2	0.2	Range	0.8	0.1	0.2	Range	0.6	0.2	0.3	Range	1.2	0.4	0.6	Range	0.6	0.4	0.4	0.34			Average 14.5 °C	Average 14.3 °C	Average 14.7 °C	Average 14.7 °C	Average 13.3 °C
																							El5 Max 15.0 °C	El5 Max 14.9 °C	El5 Max 15.1 °C	El5 Max 15.3 °C	El5 Max 13.6 °C
																							Min 14.3 °C	Min 14.3 °C	Min 14.5 °C	Min 14.3 °C	Min 13.1 °C
																							Average 14.5 °C	Average 14.4 °C	Average 14.6 °C	Average 14.5 °C	Average 13.3 °C
																							El6 Max 15.0 °C	El6 Max 14.3 °C	El6 Max 14.9 °C	El6 Max 15.8 °C	El6 Max 13.8 °C
																							Min 14.4 °C	Min 14.3 °C	Min 14.6 °C	Min 14.5 °C	Min 13.2 °C
																							Average 14.6 °C	Average 14.3 °C	Average 14.8 °C	Average 15.0 °C	Average 13.4 °C
																							El7 Max 14.8 °C	El7 Max 15.0 °C	El7 Max 14.9 °C	El7 Max 15.3 °C	El7 Max 13.3 °C
																							Min 14.4 °C	Min 14.3 °C	Min 14.5 °C	Min 14.6 °C	Min 13.2 °C
																							Average 14.6 °C	Average 14.5 °C	Average 14.6 °C	Average 14.9 °C	Average 13.3 °C
																							El8 Max 15.0 °C	El8 Max 15.1 °C	El8 Max 15.2 °C	El8 Max 15.5 °C	El8 Max 13.4 °C
																							Min 14.5 °C	Min 14.3 °C	Min 14.4 °C	Min 14.5 °C	Min 13.2 °C
																							Average 14.6 °C	Average 14.5 °C	Average 14.7 °C	Average 14.9 °C	Average 13.3 °C
																							El9 Max 14.9 °C	El9 Max 14.5 °C	El9 Max 14.9 °C	El9 Max 14.9 °C	El9 Max 13.4 °C
																							Min 14.4 °C	Min 14.2 °C	Min 14.6 °C	Min 14.3 °C	Min 13.3 °C
																							Average 14.5 °C	Average 14.3 °C	Average 14.7 °C	Average 14.6 °C	Average 13.3 °C
																							Sp1 16.0 °C	Sp1 16.5 °C	Sp1 16.3 °C	Sp1 16.6 °C	Sp1 14.2 °C

## Sheet: 25.6.2020
25.6.2020 г. 21:39:20				25.6.2020 г. 22:41:24				25.6.2020 г. 23:04:36				25.6.2020 г. 23:23:49				25.6.2020 г. 23:40:03							25.6.2020 г. 21:39:20	25.6.2020 г. 22:41:24	25.6.2020 г. 23:04:36	25.6.2020 г. 23:23:49	25.6.2020 г. 23:40:03
																							Measurements	Measurements	Measurements	Measurements	Measurements
	Max	Min	Average		Max	Min	Average		Max	Min	Average		Max	Min	Average		Max	Min	Average	Average±St.Deviation			El1 Max 20.6 °C	El1 Max 18.7 °C	El1 Max 20.5 °C	El1 Max 19.9 °C	El1 Max 20.6 °C
El1	20.6	20.3	20.4	El1	18.7	18.3	18.5	El1	20.5	20.2	20.3	El1	19.9	19.8	19.8	El1	20.6	20.3	20.4	19.88	0.724983	Head	Min 20.3 °C	Min 18.3 °C	Min 20.2 °C	Min 19.8 °C	Min 20.3 °C
El2	20.5	20.4	20.4	El2	18.7	18.3	18.5	El2	20.3	20.1	20.2	El2	19.8	19.7	19.8	El2	20.6	20.4	20.5	19.88	0.730479	Back	Average 20.4 °C	Average 18.5 °C	Average 20.3 °C	Average 19.8 °C	Average 20.4 °C
El3	20.5	20.5	20.5	El3	18.6	18.3	18.5	El3	20.3	20.1	20.2	El3	19.8	19.6	19.7	El3	20.7	20.6	20.7	19.92	0.785875	Annus	El2 Max 20.5 °C	El2 Max 18.7 °C	El2 Max 20.3 °C	El2 Max 19.8 °C	El2 Max 20.6 °C
El4	20.5	20.3	20.4	El4	18.8	18.3	18.6	El4	20.2	20.1	20.2	El4	19.9	19.7	19.8	El4	20.6	20.4	20.4	19.88	0.676461	Front right	Min 20.4 °C	Min 18.3 °C	Min 20.1 °C	Min 19.7 °C	Min 20.4 °C
El5	20.6	20.4	20.5	El5	18.8	18.4	18.6	El5	20.3	20.1	20.2	El5	19.9	19.8	19.8	El5	20.5	20.4	20.5	19.92	0.708237	Front left	Average 20.4 °C	Average 18.5 °C	Average 20.2 °C	Average 19.8 °C	Average 20.5 °C
El6	20.6	20.4	20.4	El6	18.6	18.4	18.5	El6	20.3	20.1	20.2	El6	19.8	19.7	19.8	El6	20.6	20.5	20.6	19.9	0.748331	Middle right	El3 Max 20.5 °C	El3 Max 18.6 °C	El3 Max 20.3 °C	El3 Max 19.8 °C	El3 Max 20.7 °C
El7	20.6	20.5	20.5	El7	18.7	18.2	18.5	El7	20.4	20.2	20.3	El7	19.8	19.7	19.8	El7	20.6	20.5	20.5	19.92	0.754718	Middle left	Min 20.5 °C	Min 18.3 °C	Min 20.1 °C	Min 19.6 °C	Min 20.6 °C
El8	20.6	20.5	20.5	El8	18.5	18.3	18.4	El8	20.4	20.1	20.2	El8	19.9	19.6	19.7	El8	20.7	20.6	20.6	19.88	0.803492	Back left	Average 20.5 °C	Average 18.5 °C	Average 20.2 °C	Average 19.7 °C	Average 20.7 °C
El9	20.7	20.4	20.5	El9	18.5	18.3	18.4	El9	20.4	20.1	20.2	El9	19.9	19.7	19.8	El9	20.7	20.6	20.6	19.9	0.8	Back right	El4 Max 20.5 °C	El4 Max 18.8 °C	El4 Max 20.2 °C	El4 Max 19.9 °C	El4 Max 20.6 °C
																				Global average			Min 20.3 °C	Min 18.3 °C	Min 20.1 °C	Min 19.7 °C	Min 20.4 °C
Average	20.5778	20.4111	20.4556	Average	18.6556	18.3111	18.5	Average	20.3444	20.1222	20.2222	Average	19.8556	19.7	19.7778	Average	20.6222	20.4778	20.5333	19.8311	0.803431		Average 20.4 °C	Average 18.6 °C	Average 20.2 °C	Average 19.8 °C	Average 20.4 °C
Max	20.7	20.5	20.5	Max	18.8	18.4	18.6	Max	20.5	20.2	20.3	Max	19.9	19.8	19.8	Max	20.7	20.6	20.7	20.7			El5 Max 20.6 °C	El5 Max 18.8 °C	El5 Max 20.3 °C	El5 Max 19.9 °C	El5 Max 20.5 °C
Min	20.5	20.3	20.4	Min	18.5	18.2	18.4	Min	20.2	20.1	20.2	Min	19.8	19.6	19.7	Min	20.5	20.3	20.4	18.2			Min 20.4 °C	Min 18.4 °C	Min 20.1 °C	Min 19.8 °C	Min 20.4 °C
Range	0.2	0.2	0.1	Range	0.3	0.2	0.2	Range	0.3	0.1	0.1	Range	0.1	0.2	0.1	Range	0.2	0.3	0.3	0.18			Average 20.5 °C	Average 18.6 °C	Average 20.2 °C	Average 19.8 °C	Average 20.5 °C
																							El6 Max 20.6 °C	El6 Max 18.6 °C	El6 Max 20.3 °C	El6 Max 19.9 °C	El6 Max 20.6 °C
																							Min 20.4 °C	Min 18.4 °C	Min 20.1 °C	Min 19.7 °C	Min 20.5 °C
																							Average 20.4 °C	Average 18.5 °C	Average 20.2 °C	Average 19.8 °C	Average 20.6 °C
																							El7 Max 20.6 °C	El7 Max 18.7 °C	El7 Max 20.4 °C	El7 Max 19.8 °C	El7 Max 20.6 °C
																							Min 20.5 °C	Min 18.2 °C	Min 20.2 °C	Min 19.7 °C	Min 20.5 °C
																							Average 20.5 °C	Average 18.5 °C	Average 20.3 °C	Average 19.8 °C	Average 20.5 °C
																							El8 Max 20.6 °C	El8 Max 18.5 °C	El8 Max 20.4 °C	El8 Max 19.9 °C	El8 Max 20.7 °C
																							Min 20.5 °C	Min 18.3 °C	Min 20.1 °C	Min 19.6 °C	Min 20.6 °C
																							Average 20.5 °C	Average 18.4 °C	Average 20.2 °C	Average 19.7 °C	Average 20.6 °C
																							El9 Max 20.7 °C	El9 Max 18.5 °C	El9 Max 20.4 °C	El9 Max 19.9 °C	El9 Max 20.7 °C
																							Min 20.4 °C	Min 18.3 °C	Min 20.1 °C	Min 19.7 °C	Min 20.6 °C
																							Average 20.5 °C	Average 18.4 °C	Average 20.2 °C	Average 19.8 °C	Average 20.6 °C

## Sheet: 27.6.2020
27.6.2020 г. 21:59:05				27.6.2020 г. 22:16:40				27.6.2020 г. 22:39:10				27.6.2020 г. 22:50:33				27.6.2020 г. 23:13:28							27.6.2020 г. 21:59:05	27.6.2020 г. 22:16:40	27.6.2020 г. 22:39:10	27.6.2020 г. 22:50:33	27.6.2020 г. 23:13:28
																							Measurements	Measurements	Measurements	Measurements	Measurements
	Max	Min	Average		Max	Min	Average		Max	Min	Average		Max	Min	Average		Max	Min	Average	Average±St.Deviation			El1 Max 18.7 °C	El1 Max 18.3 °C	El1 Max 18.4 °C	El1 Max 17.3 °C	El1 Max 18.8 °C
El1	18.7	18.3	18.5	El1	18.3	18	18.1	El1	18.4	17.9	18	El1	17.3	16.6	16.8	El1	18.8	18.4	18.7	18.02	0.661513	Head	Min 18.3 °C	Min 18.0 °C	Min 17.9 °C	Min 16.6 °C	Min 18.4 °C
El2	18.8	18.6	18.7	El2	18.6	18.3	18.5	El2	18.1	17.9	18	El2	16.7	16.4	16.6	El2	19	18.7	18.8	18.12	0.808455	Back	Average 18.5 °C	Average 18.1 °C	Average 18.0 °C	Average 16.8 °C	Average 18.7 °C
El3	19	18.7	18.9	El3	18.6	18.2	18.5	El3	18.2	18	18	El3	16.8	16.6	16.7	El3	18.9	18.7	18.8	18.18	0.803492	Annus	El2 Max 18.8 °C	El2 Max 18.6 °C	El2 Max 18.1 °C	El2 Max 16.7 °C	El2 Max 19.0 °C
El4	18.9	18.5	18.6	El4	18.4	18.1	18.2	El4	18.1	17.9	18	El4	16.7	16.6	16.6	El4	19.7	18.8	19	18.08	0.815843	Front right	Min 18.6 °C	Min 18.3 °C	Min 17.9 °C	Min 16.4 °C	Min 18.7 °C
El5	19.1	18.3	18.5	El5	18.9	18.2	18.4	El5	18.6	18	18.2	El5	17.8	16.6	16.9	El5	19	18.7	18.8	18.16	0.65909	Front left	Average 18.7 °C	Average 18.5 °C	Average 18.0 °C	Average 16.6 °C	Average 18.8 °C
El6	19	18.8	18.9	El6	18.5	18.2	18.3	El6	18.1	18	18	El6	17.1	16.5	16.6	El6	19.1	18.8	18.9	18.14	0.845222	Middle right	El3 Max 19.0 °C	El3 Max 18.6 °C	El3 Max 18.2 °C	El3 Max 16.8 °C	El3 Max 18.9 °C
El7	19.1	18.7	18.8	El7	18.8	18.5	18.6	El7	18.4	18	18.2	El7	17.5	16.5	17	El7	19.1	18.8	18.9	18.3	0.69282	Middle left	Min 18.7 °C	Min 18.2 °C	Min 18.0 °C	Min 16.6 °C	Min 18.7 °C
El8	19	18.5	18.8	El8	18.7	18.2	18.5	El8	18.3	17.9	18	El8	17.3	16.8	17	El8	19	18.8	18.9	18.24	0.69455	Back left	Average 18.9 °C	Average 18.5 °C	Average 18.0 °C	Average 16.7 °C	Average 18.8 °C
El9	19	18.7	18.9	El9	18.8	18.1	18.5	El9	18.8	18	18.2	El9	17	16.7	16.8	El9	18.9	18.7	18.8	18.24	0.760526	Back right	El4 Max 18.9 °C	El4 Max 18.4 °C	El4 Max 18.1 °C	El4 Max 16.7 °C	El4 Max 19.7 °C
																				Global average			Min 18.5 °C	Min 18.1 °C	Min 17.9 °C	Min 16.6 °C	Min 18.8 °C
Average	18.9556	18.5667	18.7333	Average	18.6222	18.2	18.4	Average	18.3333	17.9556	18.0667	Average	17.1333	16.5889	16.7778	Average	19.0556	18.7111	18.8444	18.0689	0.713621		Average 18.6 °C	Average 18.2 °C	Average 18.0 °C	Average 16.6 °C	Average 19.0 °C
Max	19.1	18.8	18.9	Max	18.9	18.5	18.6	Max	18.8	18	18.2	Max	17.8	16.8	17	Max	19.7	18.8	19	19			El5 Max 19.1 °C	El5 Max 18.9 °C	El5 Max 18.6 °C	El5 Max 17.8 °C	El5 Max 19.0 °C
Min	18.7	18.3	18.5	Min	18.3	18	18.1	Min	18.1	17.9	18	Min	16.7	16.4	16.6	Min	18.8	18.4	18.7	16.6			Min 18.3 °C	Min 18.2 °C	Min 18.0 °C	Min 16.6 °C	Min 18.7 °C
Range	0.4	0.5	0.4	Range	0.6	0.5	0.5	Range	0.7	0.1	0.2	Range	1.1	0.4	0.4	Range	0.9	0.4	0.3	0.36			Average 18.5 °C	Average 18.4 °C	Average 18.2 °C	Average 16.9 °C	Average 18.8 °C
																							El6 Max 19.0 °C	El6 Max 18.5 °C	El6 Max 18.1 °C	El6 Max 17.1 °C	El6 Max 19.1 °C
																							Min 18.8 °C	Min 18.2 °C	Min 18.0 °C	Min 16.5 °C	Min 18.8 °C
																							Average 18.9 °C	Average 18.3 °C	Average 18.0 °C	Average 16.6 °C	Average 18.9 °C
																							El7 Max 19.1 °C	El7 Max 18.8 °C	El7 Max 18.4 °C	El7 Max 17.5 °C	El7 Max 19.1 °C
																							Min 18.7 °C	Min 18.5 °C	Min 18.0 °C	Min 16.5 °C	Min 18.8 °C
																							Average 18.8 °C	Average 18.6 °C	Average 18.2 °C	Average 17.0 °C	Average 18.9 °C
																							El8 Max 19.0 °C	El8 Max 18.7 °C	El8 Max 18.3 °C	El8 Max 17.3 °C	El8 Max 19.0 °C
																							Min 18.5 °C	Min 18.2 °C	Min 17.9 °C	Min 16.8 °C	Min 18.8 °C
																							Average 18.8 °C	Average 18.5 °C	Average 18.0 °C	Average 17.0 °C	Average 18.9 °C
																							El9 Max 19.0 °C	El9 Max 18.8 °C	El9 Max 18.8 °C	El9 Max 17.0 °C	El9 Max 18.9 °C
																							Min 18.7 °C	Min 18.1 °C	Min 18.0 °C	Min 16.7 °C	Min 18.7 °C
																							Average 18.9 °C	Average 18.5 °C	Average 18.2 °C	Average 16.8 °C	Average 18.8 °C

## Sheet: 28.6.2020
																							28.6.2020 г. 21:48:15	28.6.2020 г. 22:16:07	28.6.2020 г. 22:34:05	28.6.2020 г. 23:02:23	28.6.2020 г. 23:28:11
																							Measurements	Measurements	Measurements	Measurements	Measurements
	Max	Min	Average		Max	Min	Average		Max	Min	Average		Max	Min	Average		Max	Min	Average	Average±St.Deviation			El1 Max 19.8 °C	El1 Max 17.9 °C	El1 Max 16.7 °C	El1 Max 17.4 °C	El1 Max 16.4 °C
El1	19.8	19.2	19.5	El1	17.9	17.7	17.8	El1	16.7	16.2	16.3	El1	17.4	17.1	17.3	El1	16.4	15.7	16	17.38	1.24483	Head	Min 19.2 °C	Min 17.7 °C	Min 16.2 °C	Min 17.1 °C	Min 15.7 °C
El2	19.7	19.6	19.6	El2	18.2	17.9	17.9	El2	16.7	16.4	16.5	El2	17.9	17.3	17.6	El2	16.2	15.8	16	17.52	1.25124	Back	Average 19.5 °C	Average 17.8 °C	Average 16.3 °C	Average 17.3 °C	Average 16.0 °C
El3	19.9	19.4	19.6	El3	18.6	17.9	18.2	El3	16.9	16.5	16.6	El3	17.8	17.4	17.6	El3	16.7	15.8	16.1	17.62	1.23353	Annus	El2 Max 19.7 °C	El2 Max 18.2 °C	El2 Max 16.7 °C	El2 Max 17.9 °C	El2 Max 16.2 °C
El4	19.7	19.3	19.5	El4	18	17.8	17.9	El4	16.8	16.4	16.6	El4	17.9	17.3	17.6	El4	17	15.8	16.2	17.56	1.15343	Front right	Min 19.6 °C	Min 17.9 °C	Min 16.4 °C	Min 17.3 °C	Min 15.8 °C
El5	20.1	19	19.6	El5	19.2	17.9	18.1	El5	16.8	16.4	16.6	El5	17.7	17.2	17.5	El5	16.3	15.7	16	17.56	1.24996	Front left	Average 19.6 °C	Average 17.9 °C	Average 16.5 °C	Average 17.6 °C	Average 16.0 °C
El6	19.8	19.6	19.7	El6	17.9	17.7	17.8	El6	16.8	16.6	16.7	El6	17.9	17.6	17.8	El6	16.4	15.8	16.1	17.62	1.22866	Middle right	El3 Max 19.9 °C	El3 Max 18.6 °C	El3 Max 16.9 °C	El3 Max 17.8 °C	El3 Max 16.7 °C
El7	19.9	19.5	19.7	El7	18.9	18.1	18.3	El7	17	16.7	16.9	El7	17.9	17.5	17.7	El7	16.3	15.8	16.1	17.74	1.22898	Middle left	Min 19.4 °C	Min 17.9 °C	Min 16.5 °C	Min 17.4 °C	Min 15.8 °C
El8	20	19	19.6	El8	18.7	18.2	18.4	El8	17	16.4	16.7	El8	17.9	17.5	17.7	El8	16.5	16	16.3	17.74	1.1876	Back left	Average 19.6 °C	Average 18.2 °C	Average 16.6 °C	Average 17.6 °C	Average 16.1 °C
El9	19.7	19.2	19.5	El9	18.1	17.8	18	El9	17.4	16.6	16.9	El9	17.9	17.5	17.7	El9	16.3	15.8	16	17.62	1.16859	Back right	El4 Max 19.7 °C	El4 Max 18.0 °C	El4 Max 16.8 °C	El4 Max 17.9 °C	El4 Max 17.0 °C
																				Global average			Min 19.3 °C	Min 17.8 °C	Min 16.4 °C	Min 17.3 °C	Min 15.8 °C
Average	19.8444	19.3111	19.5889	Average	18.3889	17.8889	18.0444	Average	16.9	16.4667	16.6444	Average	17.8111	17.3778	17.6111	Average	16.4556	15.8	16.0889	17.4733	1.1401		Average 19.5 °C	Average 17.9 °C	Average 16.6 °C	Average 17.6 °C	Average 16.2 °C
Max	20.1	19.6	19.7	Max	19.2	18.2	18.4	Max	17.4	16.7	16.9	Max	17.9	17.6	17.8	Max	17	16	16.3	19.6			El5 Max 20.1 °C	El5 Max 19.2 °C	El5 Max 16.8 °C	El5 Max 17.7 °C	El5 Max 16.3 °C
Min	19.7	19	19.5	Min	17.9	17.7	17.8	Min	16.7	16.2	16.3	Min	17.4	17.1	17.3	Min	16.2	15.7	16	16			Min 19.0 °C	Min 17.9 °C	Min 16.4 °C	Min 17.2 °C	Min 15.7 °C
Range	0.4	0.6	0.2	Range	1.3	0.5	0.6	Range	0.7	0.5	0.6	Range	0.5	0.5	0.5	Range	0.8	0.3	0.3	0.48			Average 19.6 °C	Average 18.1 °C	Average 16.6 °C	Average 17.5 °C	Average 16.0 °C
																							El6 Max 19.8 °C	El6 Max 17.9 °C	El6 Max 16.8 °C	El6 Max 17.9 °C	El6 Max 16.4 °C
																							Min 19.6 °C	Min 17.7 °C	Min 16.6 °C	Min 17.6 °C	Min 15.8 °C
																							Average 19.7 °C	Average 17.8 °C	Average 16.7 °C	Average 17.8 °C	Average 16.1 °C
																							El7 Max 19.9 °C	El7 Max 18.9 °C	El7 Max 17.0 °C	El7 Max 17.9 °C	El7 Max 16.3 °C
																							Min 19.5 °C	Min 18.1 °C	Min 16.7 °C	Min 17.5 °C	Min 15.8 °C
																							Average 19.7 °C	Average 18.3 °C	Average 16.9 °C	Average 17.7 °C	Average 16.1 °C
																							El8 Max 20.0 °C	El8 Max 18.7 °C	El8 Max 17.0 °C	El8 Max 17.9 °C	El8 Max 16.5 °C
																							Min 19.0 °C	Min 18.2 °C	Min 16.4 °C	Min 17.5 °C	Min 16.0 °C
																							Average 19.6 °C	Average 18.4 °C	Average 16.7 °C	Average 17.7 °C	Average 16.3 °C
																							El9 Max 19.7 °C	El9 Max 18.1 °C	El9 Max 17.4 °C	El9 Max 17.9 °C	El9 Max 16.3 °C
																							Min 19.2 °C	Min 17.8 °C	Min 16.6 °C	Min 17.5 °C	Min 15.8 °C
																							Average 19.5 °C	Average 18.0 °C	Average 16.9 °C	Average 17.7 °C	Average 16.0 °C

## Sheet: 17.7.2020
																							17.7.2020 г. 21:38:39	17.7.2020 г. 21:55:24	17.7.2020 г. 22:29:31	17.7.2020 г. 22:40:11	17.7.2020 г. 22:50:17
17.7.2020 г. 21:38:39				17.7.2020 г. 21:55:24				17.7.2020 г. 22:29:31				17.7.2020 г. 22:40:11				17.7.2020 г. 22:50:17							Measurements	Measurements	Measurements	Measurements	Measurements
	Max	Min	Average		Max	Min	Average		Max	Min	Average		Max	Min	Average		Max	Min	Average	Average±St.Deviation			El1 Max 18.1 °C	El1 Max 17.3 °C	El1 Max 16.5 °C	El1 Max 17.3 °C	El1 Max 15.7 °C
El1	18.1	17.1	17.7	El1	17.3	16.9	17.1	El1	16.5	16.3	16.4	El1	17.3	16.8	17.1	El1	15.7	15.5	15.6	16.78	0.719444	Head	Min 17.1 °C	Min 16.9 °C	Min 16.3 °C	Min 16.8 °C	Min 15.5 °C
El2	18.4	18.1	18.2	El2	17.7	17.4	17.5	El2	16.4	16.2	16.3	El2	17.3	16.9	17	El2	15.8	15.6	15.7	16.94	0.877724	Back	Average 17.7 °C	Average 17.1 °C	Average 16.4 °C	Average 17.1 °C	Average 15.6 °C
El3	18.5	18	18.2	El3	18.6	17.6	17.8	El3	16.6	16.1	16.3	El3	17.3	17	17.1	El3	15.8	15.6	15.7	17.02	0.923905	Annus	El2 Max 18.4 °C	El2 Max 17.7 °C	El2 Max 16.4 °C	El2 Max 17.3 °C	El2 Max 15.8 °C
El4	18.2	17.7	17.9	El4	17.8	17.1	17.4	El4	16.9	16.2	16.4	El4	17.3	17	17.1	El4	16.9	15.5	15.7	16.9	0.77201	Front right	Min 18.1 °C	Min 17.4 °C	Min 16.2 °C	Min 16.9 °C	Min 15.6 °C
El5	18.7	17.7	18.1	El5	18.4	17.2	17.6	El5	16.7	16.2	16.4	El5	18.1	17.2	17.4	El5	16.3	15.6	15.8	17.06	0.838093	Front left	Average 18.2 °C	Average 17.5 °C	Average 16.3 °C	Average 17.0 °C	Average 15.7 °C
El6	19.1	18.1	18.4	El6	18.1	17.6	17.8	El6	20.3	16.3	16.9	El6	17.5	17	17.1	El6	16.1	15.7	15.8	17.2	0.878635	Middle right	El3 Max 18.5 °C	El3 Max 18.6 °C	El3 Max 16.6 °C	El3 Max 17.3 °C	El3 Max 15.8 °C
El7	18.9	18.3	18.5	El7	18.2	17.6	17.8	El7	16.9	16.4	16.6	El7	18.7	17.2	17.5	El7	16	15.6	15.7	17.22	0.974474	Middle left	Min 18.0 °C	Min 17.6 °C	Min 16.1 °C	Min 17.0 °C	Min 15.6 °C
El8	18.5	18.1	18.2	El8	17.8	17.4	17.6	El8	16.7	16.3	16.5	El8	17.5	17.2	17.4	El8	16.2	15.7	15.8	17.1	0.848528	Back left	Average 18.2 °C	Average 17.8 °C	Average 16.3 °C	Average 17.1 °C	Average 15.7 °C
El9	18.3	17.8	18.1	El9	18	17.5	17.8	El9	17.2	16.3	16.7	El9	17.4	17	17.2	El9	16	15.4	15.6	17.08	0.884081	Back right	El4 Max 18.2 °C	El4 Max 17.8 °C	El4 Max 16.9 °C	El4 Max 17.3 °C	El4 Max 16.9 °C
																				Global average			Min 17.7 °C	Min 17.1 °C	Min 16.2 °C	Min 17.0 °C	Min 15.5 °C
Average	18.5222	17.8778	18.1444	Average	17.9889	17.3667	17.6	Average	17.1333	16.2556	16.5	Average	17.6	17.0333	17.2111	Average	16.0889	15.5778	15.7111	16.8844	0.787169		Average 17.9 °C	Average 17.4 °C	Average 16.4 °C	Average 17.1 °C	Average 15.7 °C
Max	19.1	18.3	18.5	Max	18.6	17.6	17.8	Max	20.3	16.4	16.9	Max	18.7	17.2	17.5	Max	16.9	15.7	15.8	18.3			El5 Max 18.7 °C	El5 Max 18.4 °C	El5 Max 16.7 °C	El5 Max 18.1 °C	El5 Max 16.3 °C
Min	18.1	17.1	17.7	Min	17.3	16.9	17.1	Min	16.4	16.1	16.3	Min	17.3	16.8	17	Min	15.7	15.4	15.6	15.6			Min 17.7 °C	Min 17.2 °C	Min 16.2 °C	Min 17.2 °C	Min 15.6 °C
Range	1	1.2	0.8	Range	1.3	0.7	0.7	Range	3.9	0.3	0.6	Range	1.4	0.4	0.5	Range	1.2	0.3	0.2	0.58			Average 18.1 °C	Average 17.6 °C	Average 16.4 °C	Average 17.4 °C	Average 15.8 °C
																							El6 Max 19.1 °C	El6 Max 18.1 °C	El6 Max 20.3 °C	El6 Max 17.5 °C	El6 Max 16.1 °C
																							Min 18.1 °C	Min 17.6 °C	Min 16.3 °C	Min 17.0 °C	Min 15.7 °C
																							Average 18.4 °C	Average 17.8 °C	Average 16.9 °C	Average 17.1 °C	Average 15.8 °C
																							El7 Max 18.9 °C	El7 Max 18.2 °C	El7 Max 16.9 °C	El7 Max 18.7 °C	El7 Max 16.0 °C
																							Min 18.3 °C	Min 17.6 °C	Min 16.4 °C	Min 17.2 °C	Min 15.6 °C
																							Average 18.5 °C	Average 17.8 °C	Average 16.6 °C	Average 17.5 °C	Average 15.7 °C
																							El8 Max 18.5 °C	El8 Max 17.8 °C	El8 Max 16.7 °C	El8 Max 17.5 °C	El8 Max 16.2 °C
																							Min 18.1 °C	Min 17.4 °C	Min 16.3 °C	Min 17.2 °C	Min 15.7 °C
																							Average 18.2 °C	Average 17.6 °C	Average 16.5 °C	Average 17.4 °C	Average 15.8 °C
																							El9 Max 18.3 °C	El9 Max 18.0 °C	El9 Max 17.2 °C	El9 Max 17.4 °C	El9 Max 16.0 °C
																							Min 17.8 °C	Min 17.5 °C	Min 16.3 °C	Min 17.0 °C	Min 15.4 °C
																							Average 18.1 °C	Average 17.8 °C	Average 16.7 °C	Average 17.2 °C	Average 15.6 °C
